# Supplementary material for: Community-Based Service Use After Clozapine Treatment: A Mirror-Image Analysis of Public Claims Data
Source: Atypon-hosted journal article supplement (doi:10.1176/appi.ps.20220471), 2023-04-05
Supplement: appi.ps.20220471.ds001.pdf [file appi.ps.20220471.ds001.pdf]

**Figure S1: Study Design**

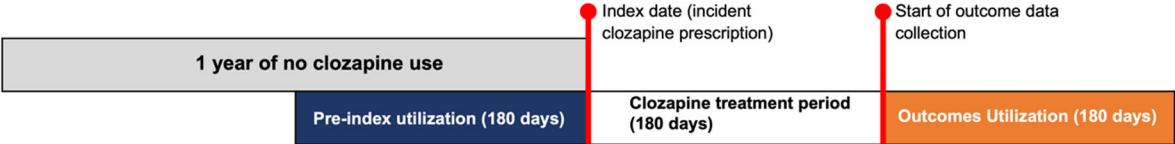

**Table S1: Public claims included in analyses**

| <b>Service</b>                  | <b>Description</b>                                                                                                                                                                                                                                                                                                                                                                                                                                                                                                                                                                                                                                                                                                                                                                                                                                                      |
|---------------------------------|-------------------------------------------------------------------------------------------------------------------------------------------------------------------------------------------------------------------------------------------------------------------------------------------------------------------------------------------------------------------------------------------------------------------------------------------------------------------------------------------------------------------------------------------------------------------------------------------------------------------------------------------------------------------------------------------------------------------------------------------------------------------------------------------------------------------------------------------------------------------------|
| Psychiatric Inpatient           | <ul style="list-style-type: none"> <li>Evaluation and treatment services provided in a licensed psychiatric unit of a community hospital or a community psychiatric hospital that is not part of a medical hospital. Services are provided to persons with acute illness where safety for self or others is an issue. Services are provided by psychiatrists, nurses, and social services staff. Persons may be involuntarily committed for evaluation and treatment.</li> </ul>                                                                                                                                                                                                                                                                                                                                                                                        |
| Community-Based Services        | <ul style="list-style-type: none"> <li>Residential services: Individuals 18 and older with a severe mental illness who have been admitted to a DHS residential facility, including community residential, 27/4 supportive housing, specialized residence, and personal care homes.</li> <li>Social rehabilitative services: Services for individuals ages 18 and over who have been diagnosed with a mental illness who have an identified need in one or more of the following areas: living, learning, working, socialization, and wellness. Eligible individuals are provided opportunities to participate in social activities that are either structured or unstructured. These activities are designed to improve social skills, relationships with others, and to learn about other available socialization/recreational activities in the community.</li> </ul> |
| Outpatient                      | <ul style="list-style-type: none"> <li>Evaluation and treatment services provided to persons who may benefit from periodic visits that may include psychiatric and psychological evaluation, medication management, and individual or group therapy. Services are provided by licensed facilities under the supervision of a psychiatrist.</li> </ul>                                                                                                                                                                                                                                                                                                                                                                                                                                                                                                                   |
| Emergent Community Intervention | <ul style="list-style-type: none"> <li>Mental Health Crisis Intervention: These services are available through a 24-hour crisis network. People experiencing crises call a toll-free number and receive telephone</li> </ul>                                                                                                                                                                                                                                                                                                                                                                                                                                                                                                                                                                                                                                            |

|                   |                                                                                                                                                                                                                                                                                                                                                                                                                                                                                                                                                                                                                                                                                                                                                           |
|-------------------|-----------------------------------------------------------------------------------------------------------------------------------------------------------------------------------------------------------------------------------------------------------------------------------------------------------------------------------------------------------------------------------------------------------------------------------------------------------------------------------------------------------------------------------------------------------------------------------------------------------------------------------------------------------------------------------------------------------------------------------------------------------|
|                   | <p>counseling. When indicated, professional behavioral health counselors will provide mobile crisis services at the person's home or in the community. Walk-in and overnight crisis services are also available.</p> <ul style="list-style-type: none"><li>• Intensive Case Management: Intensive services provided to assist children, adolescents, and adults with serious mental illness or emotional disturbance to obtain treatment and supports necessary to maintain a healthy and stable life in the community. Caseload sizes are limited to ensure adequate attention to the person's needs as they change. Service coordination services are available 24 hours a day, 7 days per week.</li></ul>                                              |
| Forensic Services | <ul style="list-style-type: none"><li>• Jail: individuals receiving services at the Allegheny County Jail, or alternative housing facilities in the community.</li><li>• Involuntary Commitment Petition: Individuals who had an involuntary commitment to inpatient psychiatric care upheld. Per PA state law, individuals are generally involuntarily committed if they are determined to be a danger to themselves or others due to a mental illness.</li><li>• Mental Health Criminal Justice: Individuals receiving Justice Related Services (JRS). JRS offers an array of supports designed to assist people with mental illness and/or co-occurring mental illness and substance use disorder who encounter the criminal justice system.</li></ul> |
